# Supplementary material for: Uniparental Markers in Italy Reveal a Sex-Biased Genetic Structure and Different Historical Strata
Source: PLoS One. 2013 May 29;8(5):e65441. doi: 10.1371/journal.pone.0065441 (PMC3666984; doi:10.1371/journal.pone.0065441)
Supplement: Table S1 — Frequencies of Y-chromosome haplogroups. Absolute values are reported for the whole Italian data set, while the frequencies within the eight sampling areas (from I to VIII) are expressed in percentage (%). (XLS) [file pone.0065441.s012.xls]

## Sheet: Table S1
Table S1. Frequencies of Y-chromosome haplogroups.
													Italy	%	I	II	III	IV	V	VI	VII	VIII
					M33							E1a	2	0.226244	0	0	0	0	0	0	0.70922	1.21951
	YAP		M96			M2						E1b1a	1	0.113122	0	0	0	0	0	0	0.70922	0
					P177	M215	M35					E1b1b1	4	0.452489	0	0	0	0	0	0.505051	2.12766	0
Y								M78				E1b1b1a	1	0.113122	0.621118	0	0	0	0	0	0	0
									V12			E1b1b1a1	7	0.791855	0	0	0	2.43902	0	1.0101	1.41844	0
									V13			E1b1b1a2	69	7.80543	9.31677	10.9589	6.89655	4.87805	6.49351	10.6061	7.0922	2.43902
									V22			E1b1b1a3	9	1.0181	0.621118	1.36986	0	0.813008	0	1.51515	2.12766	0
									V65			E1b1b1a4	2	0.226244	0.621118	0	0	0	1.2987	0	0	0
								M81				E1b1b1b	8	0.904977	0	0	3.44828	0.813008	0	0.505051	2.83688	1.21951
								M123				E1b1b1c	23	2.60181	0.621118	2.73973	0	2.43902	2.5974	3.53535	2.12766	6.09756
	M89											F	7	0.791855	1.86335	1.36986	0	1.62602	0	0	0	1.21951
					M285							G1	4	0.452489	0	0	0	0.813008	1.2987	0.505051	0.70922	0
		M201				P15						G2a	98	11.086	8.07453	6.84932	10.3448	5.69106	14.2857	16.1616	11.3475	13.4146
					P287	M377						G2c	1	0.113122	0	0	0	0	0	0.505051	0	0
					M253							I1	24	2.71493	3.10559	9.58904	10.3448	2.43902	1.2987	2.52525	0	0
			M170			L22						I1d	4	0.452489	0	1.36986	0	0	0	1.0101	0.70922	0
							P109					I1d1	3	0.339367	0	0	0	1.62602	0	0	0.70922	0
		P123			P215							I2	10	1.13122	3.72671	1.36986	0	0	1.2987	0.505051	0.70922	0
						P.37.2						I2a	4	0.452489	0	0	0	0	0	2.0202	0	0
							M26					I2a1	36	4.0724	0.621118	0	0	0.813008	0	0	1.41844	39.0244
						M223						I2b1	9	1.0181	0.621118	0	0	0.813008	1.2987	1.0101	1.41844	2.43902
					M267							J1	15	1.69683	1.24224	1.36986	0	1.62602	2.5974	2.52525	2.12766	0
			M304			P58						J1e	17	1.92308	0.621118	0	6.89655	1.62602	1.2987	1.51515	4.25532	2.43902
					M172							J2	2	0.226244	0	0	0	0	0	1.0101	0	0
						M410						J2a	67	7.57919	4.34783	10.9589	0	5.69106	12.987	7.07071	11.3475	6.09756
							M67					J2a2	19	2.14932	2.48447	1.36986	0	0.813008	2.5974	3.0303	2.83688	1.21951
								M92				J2a2a	15	1.69683	1.24224	1.36986	0	0	2.5974	3.0303	2.83688	0
						M12						J2b	4	0.452489	0	0	0	0	2.5974	1.0101	0	0
								M241				J2b2	13	1.47059	0.621118	0	3.44828	1.62602	2.5974	2.0202	2.12766	0
			M20									L	13	1.47059	0	8.21918	0	0.813008	1.2987	2.52525	0	0
					M17							R1a1a	29	3.28054	2.48447	0	0	4.87805	3.8961	4.0404	5.67376	0
			M45	M207		M458						R1a1a7	1	0.113122	0.621118	0	0	0	0	0	0	0
					M343							R1b	5	0.565611	0	1.36986	0	0	1.2987	0	1.41844	1.21951
						M18						R1b1a	2	0.226244	0	0	0	0	0	0	0	2.43902
		M9				M269						R1b1b2	61	6.90045	4.34783	6.84932	6.89655	6.50407	6.49351	8.08081	9.21986	6.09756
							P311					R1b1b2a1	1	0.113122	0	0	0	0	0	0.505051	0	0
								U106				R1b1b2a1a	16	1.80995	1.86335	1.36986	0	3.25203	1.2987	1.51515	2.83688	0
									L48			R1b1b2a1a4	16	1.80995	1.24224	4.10959	3.44828	0.813008	1.2987	2.0202	2.83688	0
								P312				R1b1b2a1b	50	5.65611	12.4224	5.47945	6.89655	4.87805	7.79221	3.0303	3.5461	1.21951
									SRY2627			R1b1b2a1b3	5	0.565611	1.24224	0	0	0	0	0.505051	0.70922	1.21951
									U152			R1b1b2a1b4	107	12.1041	18.6335	5.47945	24.1379	26.8293	11.6883	5.05051	5.67376	7.31707
										L2		R1b1b2a1b4c	59	6.67421	12.4224	12.3288	6.89655	10.5691	7.79221	2.52525	1.41844	2.43902
											L20	R1b1b2a1b4c1	5	0.565611	1.24224	1.36986	0	0	0	1.0101	0	0
									L21			R1b1b2a1b5	15	1.69683	1.86335	0	10.3448	1.62602	0	1.51515	2.83688	0
			M70									T	14	1.58371	1.24224	2.73973	0	2.43902	0	2.0202	2.12766	0
					P77							T2	7	0.791855	0	0	0	0.813008	0	2.52525	0	1.21951
Absolute values are reported for the whole Italian data set, while the frequencies within the eight sampling areas (from I to VIII) are expressed in percentage (%)
