# Supplementary material for: Uniparental Markers in Italy Reveal a Sex-Biased Genetic Structure and Different Historical Strata
Source: PLoS One. 2013 May 29;8(5):e65441. doi: 10.1371/journal.pone.0065441 (PMC3666984; doi:10.1371/journal.pone.0065441)
Supplement: Table S3 — Diversity indices computed for the different Italian sampling points. Standard diversity parameters were calculated for both Y-chromosome and mtDNA based on haplotype/sequence data and haplogroup frequencies. (XLS) [file pone.0065441.s014.xls]

## Sheet: Table S3
Table S3. Diversity indices computed for the different Italian sampling points.
Y-Chromosome		STRs									SNPs
Population	N	STR div (h) ± sd			MNPD (π) ± sd			Nucleotyde div (πN) ± sd			Haplogroup div (h) ± sd
CN	30	1	±	0.0086	10.1287	±	4.76007	0.562708	±	0.294277	0.9103	±	0.0315
SV.GE	51	0.9976	±	0.0045	9.70118	±	4.51827	0.570657	±	0.294929	0.9114	±	0.0208
CO	41	0.9976	±	0.0061	10.4841	±	4.8784	0.582453	±	0.301035	0.9512	±	0.0135
BS	39	1	±	0.0058	9.37652	±	4.39982	0.520918	±	0.271572	0.83	±	0.0514
VI	40	0.9974	±	0.0063	9.84744	±	4.60302	0.579261	±	0.300787	0.9385	±	0.0175
TV	33	1	±	0.0075	9.14962	±	4.31803	0.571851	±	0.300127	0.9186	±	0.0302
BO	29	1	±	0.0091	10.0542	±	4.73204	0.558566	±	0.292615	0.9138	±	0.031
SP.MS	24	0.9964	±	0.0133	9.2029	±	4.38482	0.511272	±	0.271564	0.8986	±	0.0361
GR.SN	86	0.9997	±	0.0018	10.2148	±	4.70959	0.567487	±	0.289887	0.8952	±	0.025
PT	13	1	±	0.0302	8.6282	±	4.26411	0.539263	±	0.299572	0.8718	±	0.0913
MC	40	1	±	0.0056	10.0795	±	4.70432	0.592911	±	0.307407	0.9449	±	0.0144
PG	37	1	±	0.0063	9.8048	±	4.59242	0.6128	±	0.318982	0.9294	±	0.0215
AQ	30	1	±	0.0086	10.7379	±	5.02792	0.596552	±	0.310836	0.9471	±	0.0178
CB	30	1	±	0.0086	10.6575	±	4.99255	0.592082	±	0.308649	0.9264	±	0.0318
BN	36	1	±	0.0065	10.5508	±	4.92183	0.586155	±	0.303925	0.9508	±	0.016
MT	25	1	±	0.0113	10.7633	±	5.06869	0.597963	±	0.313804	0.9367	±	0.0359
LE	39	0.9973	±	0.0066	10.247	±	4.78007	0.602763	±	0.312397	0.9541	±	0.016
CS.CZ.KR	38	1	±	0.006	10.9829	±	5.10442	0.610163	±	0.315106	0.9246	±	0.0243
AG	45	1	±	0.0047	11.0778	±	5.12779	0.615432	±	0.316285	0.9576	±	0.0136
CT	52	0.9977	±	0.0043	10.3077	±	4.78029	0.606335	±	0.312009	0.9434	±	0.0159
RG.SR	44	0.9979	±	0.0054	10.704	±	4.96722	0.629648	±	0.324437	0.9461	±	0.0165
OT.NU	40	0.9987	±	0.006	10.3692	±	4.8308	0.576068	±	0.298134	0.8013	±	0.0579
OR	42	0.9988	±	0.0055	10.2497	±	4.77374	0.569428	±	0.294542	0.8432	±	0.0442
ITALY	884	0.9999	±	0.0001	10.6895	±	4.87186	0.593864	±	0.299286	0.9418	±	0.0027
Standard diversity parameters for Y-chromosome based on haplotype data (STRs) and haplogroup frequencies (SNPs).
mtDNA		SEQs									SNPs
Population	N	Sequence div (h) ± sd			MNPD (π) ± sd			Nucleotyde div (πN) ± sd			Haplogroup div (h) ± sd
CN	40	0.9936	±	0.0071	7.4849	±	3.5708	0.00654	±	0.00346	0.9385	±	0.0185
SV.GE	43	0.9557	±	0.0238	9.9849	±	4.656	0.00872	±	0.00452	0.9524	±	0.0162
CO	39	0.9987	±	0.0062	9.9823	±	4.6645	0.00872	±	0.00453	0.9798	±	0.011
BS	40	0.9936	±	0.0071	9.9575	±	4.6511	0.0087	±	0.00451	0.9603	±	0.0162
VI	40	0.9949	±	0.0075	9.2329	±	4.3347	0.00806	±	0.00421	0.9679	±	0.0111
TV	39	0.9946	±	0.0078	9.6125	±	4.5029	0.0084	±	0.00437	0.9582	±	0.015
PN	29	1	±	0.0091	9.9837	±	4.701	0.00872	±	0.00457	0.9557	±	0.018
BO	35	0.9933	±	0.0094	8.607	±	4.0738	0.00752	±	0.00396	0.9429	±	0.0215
GR.SN	36	0.9841	±	0.0119	8.1828	±	3.8852	0.00715	±	0.00377	0.954	±	0.0193
PT	16	1	±	0.0221	8.8662	±	4.3155	0.00774	±	0.00422	0.9583	±	0.0312
MC	39	0.9987	±	0.0062	9.3598	±	4.3925	0.00817	±	0.00426	0.9528	±	0.0179
PG	40	0.9987	±	0.006	8.8896	±	4.1847	0.00776	±	0.00406	0.9436	±	0.0181
TR	31	0.9978	±	0.0089	10.1091	±	4.747	0.00883	±	0.00461	0.9763	±	0.0137
AQ	25	0.9933	±	0.0134	9.7786	±	4.6331	0.00854	±	0.00451	0.9567	±	0.0218
CB	37	0.997	±	0.0071	9.058	±	4.2657	0.00791	±	0.00414	0.964	±	0.0148
BN	36	0.9984	±	0.007	9.0703	±	4.2739	0.00792	±	0.00415	0.9714	±	0.0158
MT	36	1	±	0.0065	11.0251	±	5.1293	0.00963	±	0.00498	0.9746	±	0.017
LE	39	0.996	±	0.0069	10.2999	±	4.8032	0.009	±	0.00466	0.9622	±	0.0202
CS.CZ.KR	37	0.997	±	0.0071	9.0953	±	4.2821	0.00794	±	0.00416	0.9805	±	0.0115
AG	42	0.9884	±	0.0095	8.0141	±	3.7983	0.007	±	0.00368	0.9326	±	0.0279
CT	37	0.9835	±	0.0143	9.9628	±	4.6615	0.0087	±	0.00452	0.976	±	0.012
RG.SR	39	0.9865	±	0.0093	9.6418	±	4.5157	0.00842	±	0.00438	0.9312	±	0.0224
OT.NU	31	0.9914	±	0.0104	9.3346	±	4.4067	0.00815	±	0.00428	0.9398	±	0.0248
OR	39	0.996	±	0.0069	8.4105	±	3.9776	0.00735	±	0.00386	0.9258	±	0.0197
ITALY	865	0.9953	±	0.001	9.2771	±	4.2676	0.0081	±	0.00412	0.9601	±	0.0025
Standard diversity parameters for mtDNA based on sequence data (SEQs) and haplogroup frequencies (SNPs)
