# Supplementary material for: Uniparental Markers in Italy Reveal a Sex-Biased Genetic Structure and Different Historical Strata
Source: PLoS One. 2013 May 29;8(5):e65441. doi: 10.1371/journal.pone.0065441 (PMC3666984; doi:10.1371/journal.pone.0065441)
Supplement: Table S4 — Analyses of the molecular variance (AMOVA). Apportionment of the variance in %. Samples were grouped according to the geographic clusters (eight macro-areas) and to the sPCA results. (XLS) [file pone.0065441.s015.xls]

## Sheet: Table S4
Table S4. Analyses of the molecular variance (AMOVA).
			Proportion of variation (%)
Y-chromosome Grouping	N° of Groups	N° of Pop	Among Groups		Among population Within Group		Within Population
			Y-SNPs	Y-STRs	Y-SNPs	Y-STRs	Y-SNPs	Y-STRs
ALL	1	23			2.97***	3.35***	97.03***	96.65***
MACROAREAS	8	23	2.62***	3.11***	0.63*	0.56	96.75***	96.33***
SPCA groups	3§	23	3.71***	4.48***	0.67**	0.56	95.62***	94.96***
Samples were grouped according to the eight sampling macro-areas (Fig. S1) and to the Y-chromosome sPCA results. Values are in percentage and corrected upon Bonferroni test.
§ Group1 (NWI): CN,CO,SV.GE,BS,SP.MS,TV,BO,PT,GR.SN,PG
Group2 (SEI): VI,MC,AQ,CB,BN,MT,LE,CS.CZ.KR,CT,RG.SR,AG
Group3 (SAR): OT.NU,OR
*** P-value < 0,001
** P-value < 0,01
* P-value < 0,05
			Proportion of variation (%)
Mitochondrial DNA Grouping	N° of Groups	N° of Pop	Among Groups		Among population Within Group		Within Population
			mt-SNP	mt-SEQ	mt-SNP	mt-SEQ	mt-SNP	mt-SEQ
ALL	1	24			0.43*	0.32	99.57*	99.68
MACROAREAS	8	24	0.37*	0.08	0.11	0.25	99.52*	99.67
ITALY vs. SAR	2	24	1.02*	0.44	0.27	0.25	98.71*	99.31
Samples were grouped according to the eight sampling macro-areas (Fig. S1) and to the mtDNA sPCA results (ITALY vs. SAR). Values are in percentage and corrected upon Bonferroni test
*** P-value < 0,001
** P-value < 0,01
* P-value < 0,05
