# Supplementary material for: Uniparental Markers in Italy Reveal a Sex-Biased Genetic Structure and Different Historical Strata
Source: PLoS One. 2013 May 29;8(5):e65441. doi: 10.1371/journal.pone.0065441 (PMC3666984; doi:10.1371/journal.pone.0065441)
Supplement: Table S6 — Frequencies of Y-Chromosome DAPC clusters based on Italian data and comparison to other populations. The absolute number of haplotypes and individuals are shown for each population (NWI: sPCA North-Western Italy; SEI: sPCA Southern and Eastern Italy; SAR: Sardinia; IBE: Iberian Peninsula; BAL: Balkan Peninsula; GER: Central-Europe (Germany); CAU: Caucasus; WAN: Western Anatolia). (XLS) [file pone.0065441.s017.xls]

## Sheet: Table S6
Table S6. Frequencies of Y-Chromosome DAPC clusters based on Italian data and additional comparison samples.
HG	CLUSTER	N. HAPLOTYPES								N. INDIVIDUALS
		NWI	SEI	SAR	IBE*	BAL*	GER*	CAU**	WAN***	NWI	SEI	SAR	IBE*	BAL*	GER*	CAU**	WAN***
E-V13	1S	3	8	0	1	5	1	-	2	3	8	0	1	6	1	-	2
	2S	5	5	0	0	1	1	-	3	5	5	0	0	1	1	-	3
	3S	6	7	0	0	3	2	-	1	6	7	0	0	4	2	-	1
	4S	5	3	0	0	1	4	-	0	5	3	0	0	1	4	-	0
	5S	5	8	1	0	1	2	-	1	5	8	1	0	1	2	-	1
	6S	4	8	1	1	2	5	-	2	4	8	1	1	2	5	-	2
G2a-P15	1S	1	7	1	2	0	0	2	-	1	6	3	2	0	0	2	-
	2S	0	0	0	0	0	0	11	-	0	0	0	0	0	0	12	-
	3S	2	16	2	1	4	3	6	-	2	16	2	1	4	3	6	-
	4S	7	6	6	0	1	2	0	-	7	6	6	0	1	1	2	-
	5S	2	18	0	4	0	0	0	-	2	18	0	4	0	0	0	-
	6S	18	7	2	2	0	6	0	-	20	7	2	2	1	6	0	-
I2a-M26	1S	0	0	9	0	-	-	-	-	0	0	10	0	-	-	-	-
	2S	0	1	18	3	-	-	-	-	0	1	19	3	-	-	-	-
	3S	2	1	3	12	-	-	-	-	2	1	3	12	-	-	-	-
J2a-M410	1S	9	13	1	2	3	0	-	2	9	13	1	2	3	0	-	2
	2S	7	11	0	2	0	2	-	2	7	12	0	2	0	2	-	2
	3S	3	8	2	2	2	2	-	1	3	8	2	2	2	2	-	1
	4S	3	6	2	2	0	3	-	1	3	7	2	2	0	3	-	1
R-P312	1S	8	5	0	5	1	6	-	-	8	5	0	5	1	6	-	-
	2S	6	0	0	0	0	0	-	-	6	0	0	0	0	0	-	-
	3S	4	4	0	3	0	2	-	-	4	4	0	3	0	2	-	-
	4S	4	3	0	4	1	4	-	-	4	3	0	4	1	4	-	-
	5S	8	5	1	3	0	3	-	-	9	6	1	3	0	3	-	-
R-U152	1S	10	4	1	1	0	3	-	-	10	4	1	1	0	3	-	-
	2S	26	7	2	3	0	1	-	-	27	9	2	4	0	1	-	-
	3S	18	4	2	0	1	4	-	-	18	5	2	1	1	4	-	-
	4S	22	5	1	2	1	4	-	-	23	5	1	2	1	4	-	-
R-L2	1S	6	1	0	5	1	4	-	-	6	1	0	5	1	4	-	-
	2S	18	6	0	3	1	3	-	-	18	6	0	5	1	3	-	-
	3S	18	4	2	5	0	5	-	-	18	4	2	5	0	5	-	-
	4S	4	0	0	0	1	3	-	-	4	0	0	0	1	3	-	-
The absolute number of haplotypes and individuals are shown for each population (NWI: sPCA North-Western Italy; SEI: sPCA South-Eastern Italy; SAR: Sardinia; IBE: Iberian Peninsula; BAL: Balkan Peninsula; GER: Central Europe (Germany); CAU: Caucasus; WAN: Western Anatolia).
* The Genographic Project, unpublished data
** Balanovsky et al. (2011)
*** King et al. (2011)
