# Supplementary material for: Uniparental Markers in Italy Reveal a Sex-Biased Genetic Structure and Different Historical Strata
Source: PLoS One. 2013 May 29;8(5):e65441. doi: 10.1371/journal.pone.0065441 (PMC3666984; doi:10.1371/journal.pone.0065441)
Supplement: Table S7 — Frequencies of mtDNA haplogroups. Absolute values are reported for the whole Italian data set, while the frequencies within the eight sampling areas (from I to VIII) are expressed in percentage (%). (XLS) [file pone.0065441.s018.xls]

## Sheet: Table S7
Table S7. Frequencies of mtDNA haplogroups.
														Italy	%	I	II	III	IV	V	VI	VII	VIII
													L0
mtDNA													L1
													L2
		2758											L3
			3594										M*	4	0.462428	0.617284	0	0	0	0.909091	0.47619	0.847458	0
				10400	13263								C	3	0.346821	0	1.85185	0	0	0	0	0.847458	0
					5178								D	2	0.231214	0	0	0	0	0.909091	0	0.847458	0
				10873									N*	2	0.231214	0	0	0	0	1.81818	0	0	0
					4248								A	1	0.115607	0	0	0	0	0	0	0.847458	0
					10238								N1	17	1.96532	2.46914	2.77778	2.85714	1.92308	0	1.90476	2.54237	1.42857
						10034							I	14	1.6185	0.617284	1.85185	0	1.92308	0.909091	3.33333	0.847458	1.42857
					1243								W	15	1.7341	1.23457	3.7037	0	0	0.909091	2.85714	1.69492	0
													X1	1	0.115607	0	0	0	0	0	0	0.847458	0
					6371								X2	11	1.27168	0.617284	0	2.85714	0	1.81818	2.38095	1.69492	0
													X2b	4	0.462428	0.617284	0	0	0	0	1.42857	0	0
													X2d	2	0.231214	0	0	0	0	0	0.952381	0	0
													X2c	1	0.115607	0.617284	0	0	0	0	0	0	0
													X2f	1	0.115607	0	0	0	0	0	0	0.847458	0
					12705								R*	2	0.231214	0.617284	0	0	0	0	0.47619	0	0
						11719							R0	9	1.04046	0.617284	0	2.85714	1.92308	0.909091	1.90476	0.847458	0
							14766						HV	35	4.04624	6.79012	3.7037	2.85714	1.92308	3.63636	4.28571	4.23729	0
								7028					H	96	11.0983	9.25926	9.25926	17.1429	15.3846	12.7273	9.52381	16.1017	5.71429
									3010				H1	90	10.4046	12.963	2.77778	5.71429	9.61538	10	9.52381	12.7119	18.5714
													H1a	13	1.50289	0.617284	3.7037	5.71429	0	1.81818	1.90476	0	0
													H1b	1	0.115607	0	0.925926	0	0	0	0	0	0
													H1f	6	0.693642	0.617284	2.77778	0	0	0.909091	0	0	1.42857
													H1c	7	0.809249	1.23457	0	0	0	1.81818	0.952381	0	1.42857
													H1h	1	0.115607	0	0	0	0	0	0.47619	0	0
													H1o	1	0.115607	0	0.925926	0	0	0	0	0	0
									1438				H2	10	1.15607	0	0.925926	0	7.69231	0.909091	0.47619	2.54237	0
									6776				H3	34	3.93064	4.32099	3.7037	8.57143	3.84615	1.81818	1.90476	4.23729	10
									3992				H4	8	0.924855	1.23457	1.85185	2.85714	1.92308	0.909091	0.47619	0	0
													H5	37	4.27746	5.55556	4.62963	2.85714	7.69231	6.36364	4.28571	1.69492	0
													H6	12	1.38728	0.617284	1.85185	2.85714	3.84615	1.81818	1.90476	0	0
													H8	5	0.578035	0	0	0	1.92308	0	0.952381	1.69492	0
									4793				H7	21	2.42775	4.32099	0.925926	0	0	1.81818	1.90476	3.38983	4.28571
									13020				H9	2	0.231214	0	0	0	0	0.909091	0.47619	0	0
									14470A				H10	5	0.578035	0	0.925926	0	0	0.909091	1.42857	0	0
										8448			H11	5	0.578035	1.23457	0.925926	0	0	0	0	0	2.85714
										3936			H12	0	0	0	0	0	0	0	0	0	0
									14872				H13	16	1.84971	0.617284	1.85185	0	3.84615	1.81818	2.85714	1.69492	1.42857
									7645				H14	9	1.04046	1.23457	0.925926	0	0	0.909091	1.42857	1.69492	0
									6253				H15	2	0.231214	0.617284	0	0	0	0	0	0.847458	0
									10394				H16	0	0	0	0	0	0	0	0	0	0
									14364				H18	1	0.115607	0.617284	0	0	0	0	0	0	0
									14869				H19	2	0.231214	0	0	0	0	0	0.47619	0.847458	0
									10211				H23	0	0	0	0	0	0	0	0	0	0
									9620				H25	0	0	0	0	0	0	0	0	0	0
								4580					V	14	1.6185	1.85185	3.7037	0	1.92308	0.909091	0.952381	0	4.28571
						8280							B	0	0	0	0	0	0	0	0	0	0
						3970							R9	0	0	0	0	0	0	0	0	0	0
								13368					T	12	1.38728	0.617284	0.925926	2.85714	1.92308	0.909091	1.90476	2.54237	0
													T1a	29	3.3526	0.617284	9.25926	0	1.92308	2.72727	3.33333	4.23729	2.85714
													T1b	1	0.115607	0	0	0	0	0	0	0.847458	0
													T2	15	1.7341	1.23457	0	2.85714	1.92308	0	3.80952	2.54237	0
													T2a	3	0.346821	0	0	0	0	0	1.42857	0	0
													T2b	29	3.3526	3.7037	3.7037	2.85714	1.92308	4.54545	2.38095	0.847458	8.57143
													T2c	7	0.809249	0	0	0	0	3.63636	0.47619	0.847458	1.42857
													T2e	8	0.924855	0.617284	0.925926	0	0	1.81818	0.47619	0.847458	2.85714
													T2f	2	0.231214	0.617284	0	0	0	0	0.47619	0	0
								12612					J	1	0.115607	0	0	0	0	0	0.47619	0	0
													J1	4	0.462428	0.617284	0.925926	0	0	0.909091	0.47619	0	0
													J1b	11	1.27168	1.85185	0	0	1.92308	2.72727	0.952381	1.69492	0
													J1c	34	3.93064	6.17284	4.62963	14.2857	1.92308	1.81818	2.85714	1.69492	4.28571
													J1d	1	0.115607	0.617284	0	0	0	0	0	0	0
													J2	1	0.115607	0.617284	0	0	0	0	0	0	0
													J2a	11	1.27168	0	0	0	0	0.909091	1.42857	5.08475	1.42857
													J2b	18	2.08092	1.85185	0	0	1.92308	2.72727	2.38095	0.847458	7.14286
						11476							U	4	0.462428	0	0	0	0	0.909091	0.952381	0.847458	0
													U1a	11	1.27168	0.617284	0.925926	0	0	1.81818	1.90476	2.54237	0
													U1b	2	0.231214	0	0	0	0	0	0.47619	0.847458	0
													U5a	32	3.69942	4.32099	5.55556	5.71429	1.92308	7.27273	1.42857	2.54237	2.85714
													U5b	15	1.7341	0.617284	4.62963	0	0	0.909091	0.952381	0.847458	7.14286
													U6a	3	0.346821	0	0	0	3.84615	0	0.47619	0	0
													U2d	2	0.231214	0	0	0	0	0	0.47619	0.847458	0
													U2e	8	0.924855	3.08642	0.925926	0	0	0	0.47619	0.847458	0
													U3	10	1.15607	1.23457	0.925926	2.85714	0	0.909091	2.38095	0	0
													U3a	3	0.346821	1.23457	0	0	0	0.909091	0	0	0
													U4	3	0.346821	0.617284	0.925926	0	0	0.909091	0	0	0
													U4a	4	0.462428	0.617284	0.925926	0	1.92308	0	0.47619	0	0
													U4b	2	0.231214	0.617284	0	0	0	0	0	0.847458	0
													U7a	1	0.115607	0	0	0	0	0	0.47619	0	0
													U8b	4	0.462428	0	0	2.85714	0	0	0.952381	0	1.42857
										10550			K	3	0.346821	1.23457	0	0	1.92308	0	0	0	0
													K1a	38	4.39306	3.7037	7.40741	8.57143	7.69231	5.45455	2.85714	1.69492	4.28571
													K1b	4	0.462428	0	0.925926	0	1.92308	0	0.47619	0.847458	0
													K1c	2	0.231214	0	0	0	0	0	0.47619	0.847458	0
													K2	4	0.462428	1.23457	0	0	0	0	0	0	2.85714
													K2a	1	0.115607	0	0	0	1.92308	0	0	0	0
Absolute values are reported for the whole Italian data set, while the frequencies within the eight sampling macro-areas (from I to VIII, Figure S1) are expressed in percentage (%).
