# Supplementary material for: Uniparental Markers in Italy Reveal a Sex-Biased Genetic Structure and Different Historical Strata
Source: PLoS One. 2013 May 29;8(5):e65441. doi: 10.1371/journal.pone.0065441 (PMC3666984; doi:10.1371/journal.pone.0065441)
Supplement: Table S8 — Frequencies of mtDNA DAPC clusters in Italy. Values were calculated both grouping according to the geographical clusters identified with Y-Chromosome sPCA (NWI: Y-sPCA North-Western Italy; SEI: Y-sPCA Southern and Eastern Italy; SAR: Sardinia) as well as considering the continental Italy (including Sicily) altogether (ITA). The absolute number of haplotypes and individuals are shown for each DAPC-cluster, and the maximum frequency for each cluster is expressed in percentage (max%). (XLS) [file pone.0065441.s019.xls]

## Sheet: Table S8
Table S8. Frequencies of mtDNA DAPC clusters in Italy.
HG	CLUSTER	N. HAPLOTYPES				N. INDIVIDUALS				MAX % (Y-Chr SPCA GROUP)
		NWI*	SEI*	ITA**	SAR	NWI*	SEI*	ITA**	SAR
H*	1	5	2	7	0	5	2	7	0	71% (NWI) §
	2	17	24	45	3	26	40	73	3	58% (NWI)
	3	7	5	12	1	7	5	12	1	54% (SEI)
H1	1	2	6	9	0	4	7	12	0	64% (SEI)
	2	4	3	8	2	4	4	9	2	40% (NWI,SEI)
	3	12	15	28	5	25	30	56	11	45% (SEI)
H3	1	1	1	2	0	2	2	4	0	50% (NWI,SEI)
	2	0	1	1	5	0	1	1	5	83% (SAR) §
	3	7	7	14	1	12	10	22	2	50% (NWI)
H5	1	5	10	17	0	9	13	25	0	59% (SEI)
	2	3	1	4	0	5	1	6	0	83% (NWI) §
	3	4	2	6	0	4	2	6	0	67% (NWI) §
HV	1	3	4	7	0	3	4	7	0	57% (SEI)
	2	7	3	11	0	9	3	13	0	75% (NWI)
	3	0	10	12	0	2	11	15	0	85% (SEI)
U5a	1	4	2	8	1	5	3	10	1	56% (NWI)
	2	4	1	7	0	5	1	8	0	83% (NWI) §
	3	2	0	2	0	2	0	2	0	100% (NWI) §
	4	4	4	9	0	5	4	10	1	50%(NWI)
J1c	1	7	4	13	0	9	4	16	1	64% (NWI)
	2	3	2	5	2	3	2	5	2	43% (NWI)
	3	5	4	9	0	6	4	10	0	60% (NWI)
K1a	1	5	7	12	1	5	8	13	2	53% (SEI)
	2	10	4	16	0	15	5	22	1	71% (NWI)
Values were calculated both grouping according to the geographical clusters identified with Y-Chromosome sPCA (NWI: Y-sPCA North-Western Italy; SEI: Y-sPCA South-Eastern Italy; SAR: Sardinia) as well as considering the continental Italy (including Sicily) altogether (ITA). The absolute number of haplotypes and individuals are shown for each DAPC-cluster, and the maximum frequency for each cluster…
§ Number of individuals <10
* NWI & SEI	Only mtDNA populations of continental Italy with Sicily (excluding Sardinia) included also in Y-Chromosome analysis
**ITA	All mtDNA populations of continental Italy with Sicily (excluding Sardinia)
