# Supplementary material for: Uniparental Markers in Italy Reveal a Sex-Biased Genetic Structure and Different Historical Strata
Source: PLoS One. 2013 May 29;8(5):e65441. doi: 10.1371/journal.pone.0065441 (PMC3666984; doi:10.1371/journal.pone.0065441)
Supplement: Table S9 — Frequencies of mtDNA DAPC clusters based on Italian data and comparison to other populations. The absolute number of haplotypes and individuals are shown for each population (ITA: Continental Italy and Sicily; SAR: Sardinia; BASQ: Iberia Peninsula (Basques); AUST: Central Europe (Austria); MAC: Macedonians; ROM: Romanians; BALK: Balkan Peninsula). (XLS) [file pone.0065441.s020.xls]

## Sheet: Table S9
Table S9. Frequencies of mtDNA DAPC clusters based on Italian data and comparison samples.
HG	CLUSTER	N. HAPLOTYPES						N. INDIVIDUALS
		ITA	SAR	BASQ*	AUST**	MAC**	ROM**	ITA	SAR	BASQ*	AUST**	MAC**	ROM**
H*	1S	6	0	2	5	3	3	14	0	2	8	5	3
	2S	36	3	11	30	4	6	56	3	32	83	7	8
	3S	12	1	3	10	5	2	12	1	7	20	5	4
	4S	6	0	1	6	4	0	6	0	1	15	7	1
	5S	4	0	4	3	0	2	4	0	5	8	0	3
H1	1S	26	5	17	13	3	2	53	9	90	44	5	14
	2S	0	0	17	1	1	0	0	0	64	1	1	0
	3S	8	2	9	4	0	0	9	4	28	7	2	0
	4S	11	0	3	5	2	2	15	0	7	11	2	2
H3	1S	1	5	1	1	0	0	1	5	1	2	0	0
	2S	2	0	8	0	0	0	4	0	19	0	0	0
	3S	4	0	7	1	0	0	4	0	11	7	0	0
	4S	10	1	17	7	0	0	18	2	46	20	1	0
H5	1S	6	0	2	0	1	0	6	0	9	0	1	0
	2S	19	0	3	16	6	6	29	0	5	29	11	18
	3S	2	0	1	6	0	0	2	0	1	8	0	0
HV	1S	13	0	4	1	0	1	13	0	9	1	0	1
	2S	12	0	5	4	3	2	14	0	15	4	6	7
	3S	5	0	5	0	2	2	8	0	5	1	2	3
HG	CLUSTER	ITA	SARD	BASQ*		BALK***		ITA	SARD	BASQ*		BALK***
U5a	1S	2	0	2		0		2	0	3		0
	2S	7	0	5		1		8	1	13		2
	3S	8	1	2		3		10	1	3		8
	4S	9	0	2		4		10	0	2		8
The absolute number of haplotypes and individuals are shown for each population (ITA: Continental Italy and Sicily; SAR: Sardinia; BASQ: Iberia Peninsula (Basques); AUST: Central Europe (Austria); MAC: Macedonians; ROM: Romanians; BALK: Balkan Peninsula).
* Behar et al. (2012)
** Brandstätter et al. (2008)
*** Malyarchuk et al. (2003)
